# Supplementary material for: Embryonic lethality leads to hybrid male inviability in hybrids between Drosophila melanogaster and D. santomea
Source: PubMed Central journal article supplement (PMC3686193; doi:10.1002/ece3.573), 2013-04-23

Supplemental Figure 1.

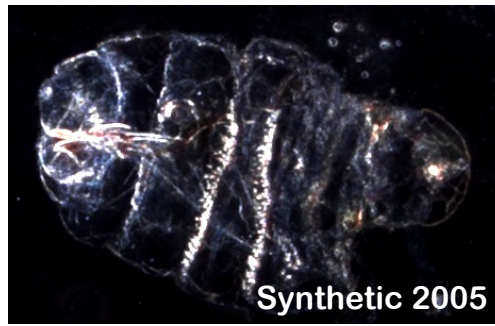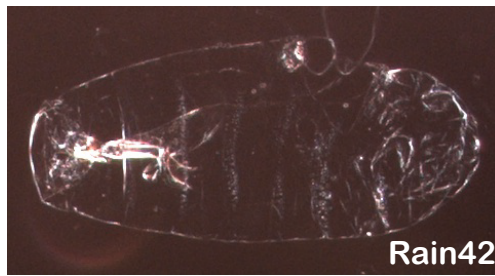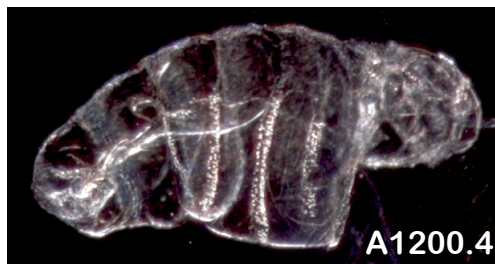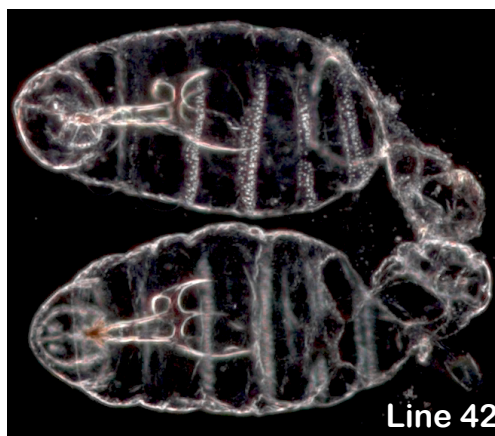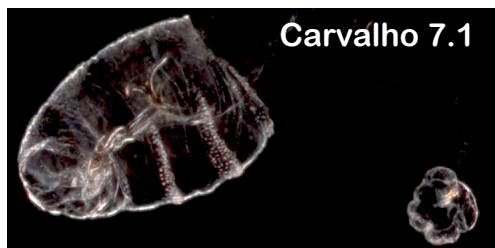

Supplement: ece30003-1580-SD1.pdf [file ece30003-1580-SD1.pdf]
